# Supplementary material for: Cell-free circulating mitochondrial DNA content and risk of hepatocellular carcinoma in patients with chronic HBV infection
Source: PubMed Central journal article supplement (PMC4827061; doi:10.1038/srep23992), 2016-04-11
Supplement: srep23992-s1.pdf [file srep23992-s1.pdf]

**Cell-free circulating mitochondrial DNA content and risk of hepatocellular carcinoma in patients with chronic HBV infection**

Ling Li<sup>1,\*</sup>, Hie-Won Hann<sup>2,\*</sup>, Shaogui Wan<sup>1,3,\*</sup>, Richard S. Hann<sup>2</sup>, Chun Wang<sup>1,4</sup>, Yinzhi Lai<sup>1</sup>, Xishan Ye<sup>1</sup>, Alison Evans<sup>1</sup>, Ronald E. Myers<sup>1</sup>, Zhong Ye<sup>1</sup>, Bingshan Li<sup>5</sup>, Jinliang Xing<sup>6</sup> & Hushan Yang<sup>1</sup>

**Supplementary Table 1. Summary of the study population.**

| Variables                       | Cancer-free HBV patients    |                        | HCC patients<br>(n=116, %) | P value |
|---------------------------------|-----------------------------|------------------------|----------------------------|---------|
|                                 | Non-cirrhotic<br>(n=140, %) | Cirrhotic<br>(n=92, %) |                            |         |
| <b>Age (Mean ± SD)</b>          | 53.3 ± 9.0                  | 55.4 ± 8.3             | 55.7 ± 9.1                 | 0.061   |
| <b>Gender</b>                   |                             |                        |                            |         |
| Female                          | 17 (12.1)                   | 9 (9.8)                | 13 (11.2)                  |         |
| Male                            | 123 (87.9)                  | 83 (90.2)              | 103 (88.8)                 | 0.856   |
| <b>Smoking status</b>           |                             |                        |                            |         |
| Never                           | 83 (59.3)                   | 52 (56.5)              | 63 (54.3)                  |         |
| Ever                            | 57 (40.7)                   | 40 (43.5)              | 53 (45.7)                  | 0.723   |
| <b>Drinking status</b>          |                             |                        |                            |         |
| Never                           | 81 (57.9)                   | 46 (50.0)              | 59 (50.9)                  |         |
| Ever                            | 59 (42.1)                   | 46 (50.0)              | 57 (49.1)                  | 0.398   |
| <b>Family history of cancer</b> |                             |                        |                            |         |
| No                              | 90 (64.3)                   | 70 (76.1)              | 82 (70.7)                  |         |
| Yes                             | 50 (35.7)                   | 22 (23.9)              | 34 (29.3)                  | 0.153   |

Supplementary Table 2. The associations of circulating mtDNA content with HCC risk.

| mtDNA              | Multivariate <sup>a</sup> |              | Multivariate <sup>b</sup> |              | Multivariate <sup>c</sup> |              | Multivariate <sup>d</sup> |              |
|--------------------|---------------------------|--------------|---------------------------|--------------|---------------------------|--------------|---------------------------|--------------|
|                    | OR (95%CI)                | P value      | OR (95%CI)                | P value      | OR (95%CI)                | P value      | OR (95%CI)                | P value      |
| <b>By median</b>   |                           |              |                           |              |                           |              |                           |              |
| > 2.47             | 1.00                      |              | 1.00                      |              | 1.00                      |              | 1.00                      |              |
| ≤ 2.47             | 2.45 (1.18-4.29)          | <b>0.010</b> | 2.54 (1.27-5.09)          | <b>0.009</b> | 2.70 (1.39-5.25)          | <b>0.004</b> | 2.69 (1.04-6.98)          | <b>0.040</b> |
| <b>By quartile</b> |                           |              |                           |              |                           |              |                           |              |
| >4.93              | 1.00                      |              | 1.00                      |              | 1.00                      |              | 1.00                      |              |
| 4.93-              | 2.54 (1.02-6.29)          | <b>0.040</b> | 2.67 (1.04-6.87)          | <b>0.040</b> | 2.92 (1.14-7.47)          | <b>0.030</b> | 1.96 (0.52-7.39)          | 0.320        |
| 2.47-              | 2.82 (1.17-6.77)          | <b>0.020</b> | 3.15 (1.19-8.32)          | <b>0.020</b> | 3.76 (1.51-9.36)          | <b>0.004</b> | 2.37 (0.65-8.66)          | 0.193        |
| ≤0.55              | 4.12 (1.55-10.95)         | <b>0.004</b> | 5.52 (1.88-16.22)         | <b>0.002</b> | 5.15 (1.84-14.41)         | <b>0.002</b> | 7.41 (1.66-33.12)         | <b>0.009</b> |
| <i>P</i> for trend |                           | <b>0.003</b> |                           | <b>0.002</b> |                           | <b>0.001</b> |                           | <b>0.003</b> |

Multivariate models adjusting for age, gender, smoking status, drinking status, family history of cancer, cirrhosis, and each of the liver enzymes (a. ALP, b. AST, c. ALT, d. GGT).

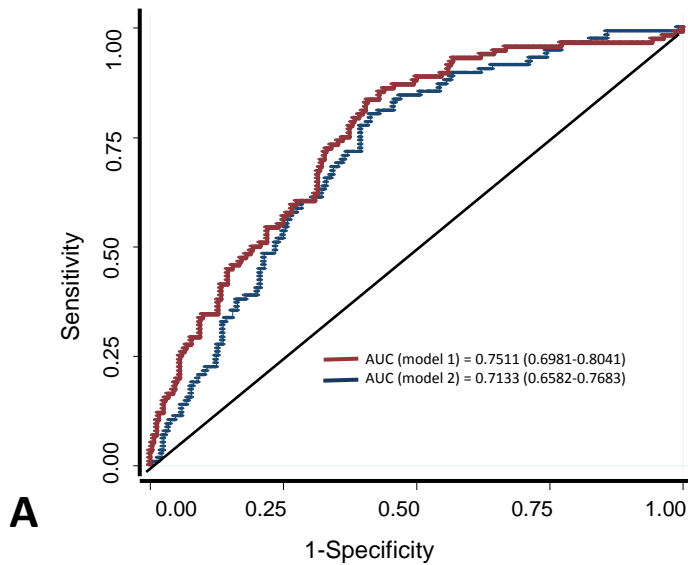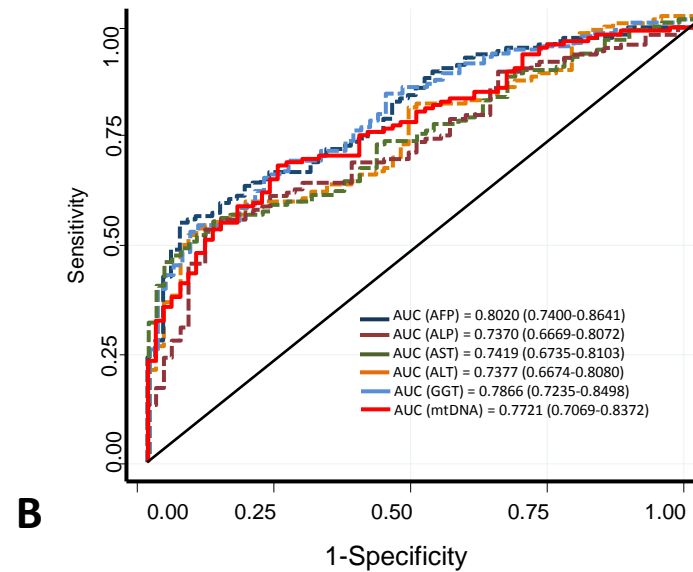

### Supplementary Figure 1. Discrimination accuracy for different HCC diagnosis models.

Discrimination accuracy for HCC diagnosis was evaluated by AUC of ROC curves. The AUCs were compared (**A**) between the model including age, gender, smoking status, drinking status, family history of cancer, cirrhosis, and mtDNA content (model 1), and the model including age, gender, smoking status, drinking status, family history of cancer, and cirrhosis (model 2) ( $P=0.046$ ) in the overall dataset; (**B**) between the model including age, gender, smoking status, drinking status, family history of cancer, cirrhosis, and mtDNA content; and the models including age, gender, smoking status, drinking status, family history of cancer, cirrhosis, and AFP ( $P=0.527$ ) or each of the liver enzymes including ALP ( $P=0.149$ ), AST ( $P=0.216$ ), ALT ( $P=0.135$ ), and GGT ( $P=0.545$ ), in the subset analyses.

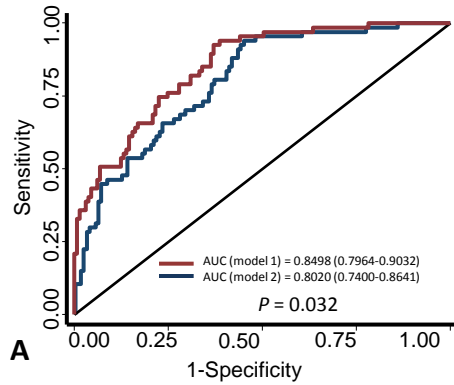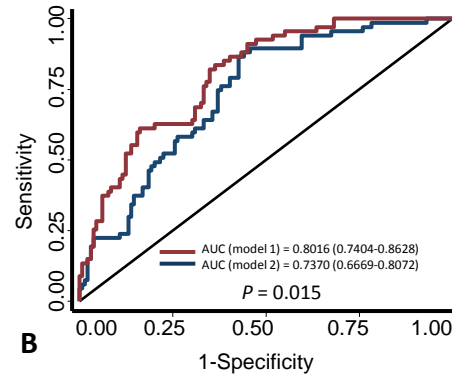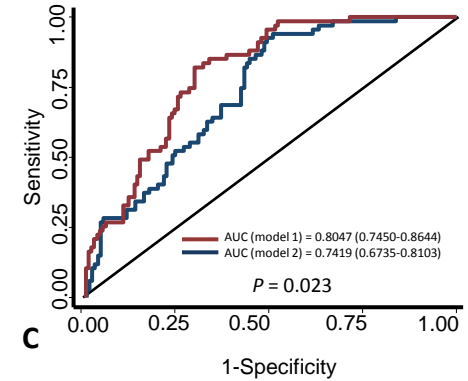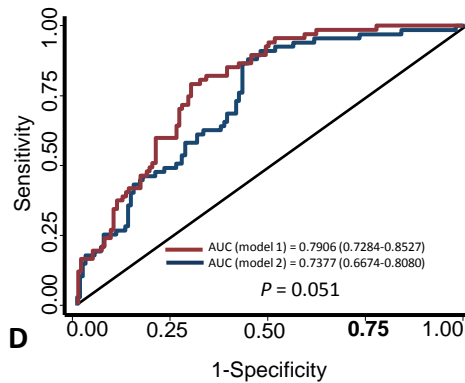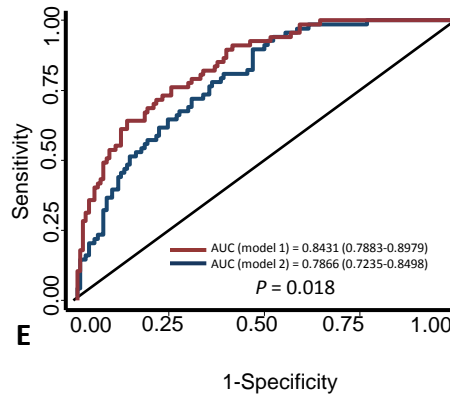

**Supplementary Figure 2. Discrimination accuracy for different HCC diagnosis models.** Discrimination accuracy for HCC diagnosis was evaluated by AUC of ROC curves. The AUCs were compared between the model including age, gender, smoking status, drinking status, family history of cancer, cirrhosis, and AFP (**A**), or each of the liver enzymes including ALP (**B**), AST (**C**), ALT (**D**), and GGT (**E**), plus mtDNA content (model 1), and the model including the above variables excluding mtDNA content (model 2).
